# Supplementary material for: Novel Genetic Melanoma Vaccines Based on Induced Pluripotent Stem Cells or Melanosphere-Derived Stem-Like Cells Display High Efficacy in a murine Tumor Rejection Model
Source: MDPI journal article supplement (doi:10.3390/vaccines8020147), 2020-03-26
Supplement: s1 [file s1]

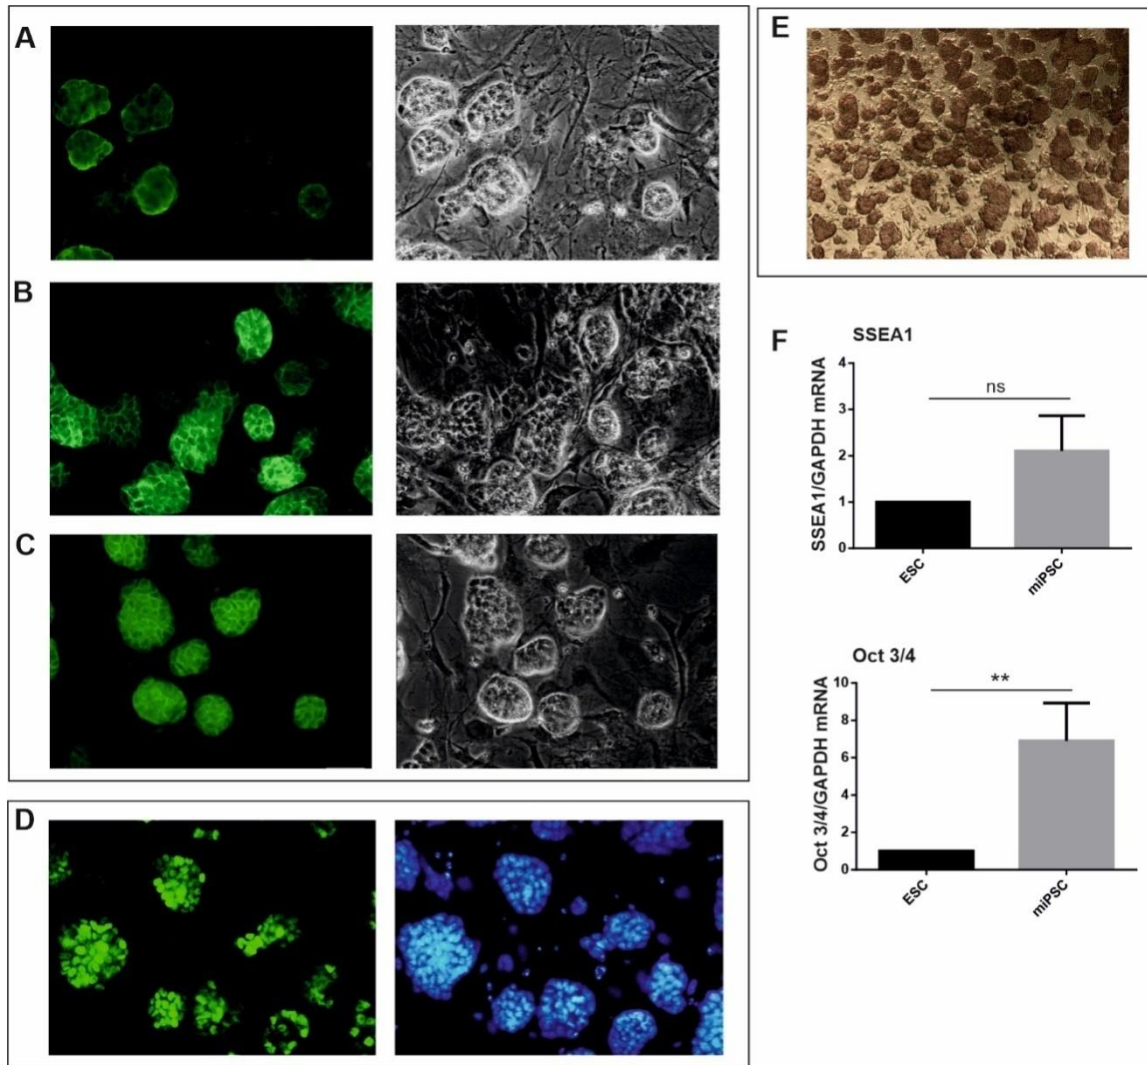

**Figure S1.** Pluripotency marker expression in miPSCs. Immunocytochemistry and qPCR were performed as described in the Methods section. iPSC expression of the surface pluripotency markers SSEA-1 (A), Epcam (B), E-cadherin (C), (fluorescence microscopy image (first column), phase-contrast microscopy image (second column)); expression of the transcription factor Nanog (D) (fluorescence microscopy image, nuclei were stained with DAPI); and alkaline phosphatase activity (E) (phase-contrast microscopy image). Quantitative PCR was used to assess Ssea-1 and Oct 3/4 expression in the miPSC. The results were normalized to the Gapdh expression level and are presented as the fold change relative to the expression in embryonic stem cells (\*\*  $p < 0.01$ ).

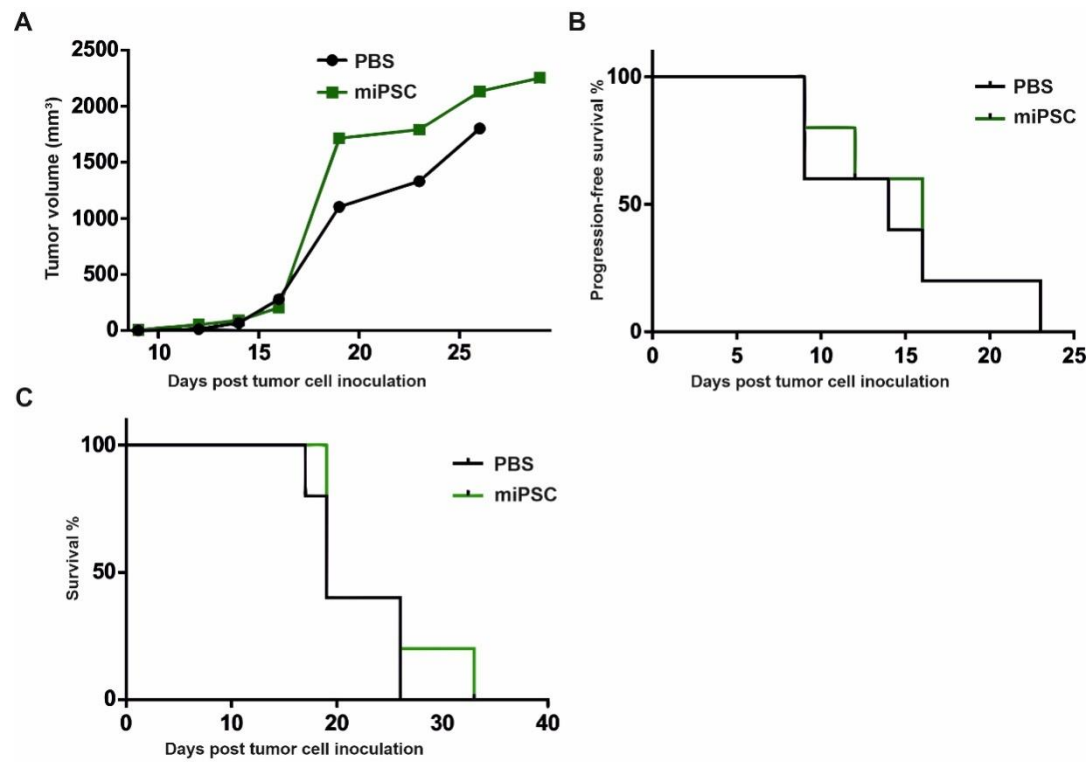

**Figure S2.** Tumor growth, disease-free survival and overall survival in mice immunized with miPSCs only. Immunization with irradiated miPSCs did not affect tumor growth (A), progression-free survival (B) or overall survival (C). Results of one experiment with five mice in each research group.
